# Supplementary material for: Highly accurate protein structure prediction for the human proteome
Source: PubMed Central journal article supplement (PMC8387240; doi:10.1038/s41586-021-03828-1), 2021-07-22
Supplement: 41586_2021_3828_MOESM2_ESM.pdf [file 41586_2021_3828_MOESM2_ESM.pdf]

## Reporting Summary

Nature Research wishes to improve the reproducibility of the work that we publish. This form provides structure for consistency and transparency in reporting. For further information on Nature Research policies, see our [Editorial Policies](#) and the [Editorial Policy Checklist](#).

### Statistics

For all statistical analyses, confirm that the following items are present in the figure legend, table legend, main text, or Methods section.

- | n/a                                 | Confirmed                                                                                                                                                                                                                                                                                      |
|-------------------------------------|------------------------------------------------------------------------------------------------------------------------------------------------------------------------------------------------------------------------------------------------------------------------------------------------|
| <input type="checkbox"/>            | <input checked="" type="checkbox"/> The exact sample size ( $n$ ) for each experimental group/condition, given as a discrete number and unit of measurement                                                                                                                                    |
| <input checked="" type="checkbox"/> | <input type="checkbox"/> A statement on whether measurements were taken from distinct samples or whether the same sample was measured repeatedly                                                                                                                                               |
| <input checked="" type="checkbox"/> | <input type="checkbox"/> The statistical test(s) used AND whether they are one- or two-sided<br><i>Only common tests should be described solely by name; describe more complex techniques in the Methods section.</i>                                                                          |
| <input checked="" type="checkbox"/> | <input type="checkbox"/> A description of all covariates tested                                                                                                                                                                                                                                |
| <input checked="" type="checkbox"/> | <input type="checkbox"/> A description of any assumptions or corrections, such as tests of normality and adjustment for multiple comparisons                                                                                                                                                   |
| <input type="checkbox"/>            | <input checked="" type="checkbox"/> A full description of the statistical parameters including central tendency (e.g. means) or other basic estimates (e.g. regression coefficient) AND variation (e.g. standard deviation) or associated estimates of uncertainty (e.g. confidence intervals) |
| <input checked="" type="checkbox"/> | <input type="checkbox"/> For null hypothesis testing, the test statistic (e.g. $F$ , $t$ , $r$ ) with confidence intervals, effect sizes, degrees of freedom and $P$ value noted<br><i>Give <math>P</math> values as exact values whenever suitable.</i>                                       |
| <input checked="" type="checkbox"/> | <input type="checkbox"/> For Bayesian analysis, information on the choice of priors and Markov chain Monte Carlo settings                                                                                                                                                                      |
| <input checked="" type="checkbox"/> | <input type="checkbox"/> For hierarchical and complex designs, identification of the appropriate level for tests and full reporting of outcomes                                                                                                                                                |
| <input type="checkbox"/>            | <input checked="" type="checkbox"/> Estimates of effect sizes (e.g. Cohen's $d$ , Pearson's $r$ ), indicating how they were calculated                                                                                                                                                         |

*Our web collection on [statistics for biologists](#) contains articles on many of the points above.*

### Software and code

Policy information about [availability of computer code](#)

#### Data collection

Source code for the AlphaFold model, trained weights, and an inference script are available under an open-source license at <https://github.com/deepmind/alphafold>. Neural networks were developed with TensorFlow v1 (<https://github.com/tensorflow/tensorflow>), Sonnet v1 (<https://github.com/deepmind/sonnet>), JaX v0.1.69 (<https://github.com/google/jax/>), and Haiku v0.0.4 (<https://github.com/deepmind/dm-haiku>).

For MSA search on UniRef90, MGnify clusters, and reduced BFD we used jackhmmer and for template search on the PDB seqres we used hmmsearch, both from HMMER v3.3 (<http://eddylab.org/software/hmmer/>). For template search against PDB70, we used HHsearch from HH-suite v3.0-beta.3 14/07/2017 (<https://github.com/soedinglab/hh-suite>). For constrained relaxation of structures, we used OpenMM v7.3.1 (<https://github.com/openmm/openmm>) with the Amber99sb force field.

Docking analysis on DGAT used P2Rank v2.1 (<https://github.com/rdk/p2rank>), MGLTools v1.5.6 (<https://ccsb.scripps.edu/mgltools/>) and AutoDockVina v1.1.2 (<http://vina.scripps.edu/download/>) on a workstation running Debian GNU/Linux rodete 5.10.40-1rodete1-amd64 x86\_64.

#### Data analysis

Data analysis used Python v3.6 (<https://www.python.org/>), NumPy v1.16.4 (<https://github.com/numpy/numpy>), SciPy v1.2.1 (<https://www.scipy.org/>), seaborn v0.11.1 (<https://github.com/mwaskom/seaborn>), scikit-learn v0.24.0 (<https://github.com/scikit-learn/>), Matplotlib v3.3.4 (<https://github.com/matplotlib/matplotlib>), pandas v1.1.5 (<https://github.com/pandas-dev/pandas>), and Colab (<https://research.google.com/colaboratory>). TM-align v20190822 (<https://zhanglab.dcm.med.umich.edu/TM-align>) was used for computing TM-scores. Structure analysis used Pymol v2.3.0 (<https://github.com/schrodinger/pymol-open-source>).

For manuscripts utilizing custom algorithms or software that are central to the research but not yet described in published literature, software must be made available to editors and reviewers. We strongly encourage code deposition in a community repository (e.g. GitHub). See the Nature Research [guidelines for submitting code & software](#) for further information.

## Data

Policy information about [availability of data](#)

All manuscripts must include a [data availability statement](#). This statement should provide the following information, where applicable:

- Accession codes, unique identifiers, or web links for publicly available datasets
- A list of figures that have associated raw data
- A description of any restrictions on data availability

AlphaFold structure predictions for the human proteome are available under a CC-BY-4.0 license at <https://alphafold.ebi.ac.uk/>.

All input data are freely available from public sources. The human reference proteome together with its xml annotations was obtained from UniProt 2021\_02 ([https://ftp.ebi.ac.uk/pub/databases/uniprot/previous\\_releases/release-2021\\_02/knowledgebase/](https://ftp.ebi.ac.uk/pub/databases/uniprot/previous_releases/release-2021_02/knowledgebase/)). At prediction time, MSA search was performed against UniRef90 2020\_03 ([https://ftp.ebi.ac.uk/pub/databases/uniprot/previous\\_releases/release-2020\\_03/uniref/](https://ftp.ebi.ac.uk/pub/databases/uniprot/previous_releases/release-2020_03/uniref/)), MGnify clusters 2018\_12 ([https://ftp.ebi.ac.uk/pub/databases/metagenomics/peptide\\_database/2018\\_12/](https://ftp.ebi.ac.uk/pub/databases/metagenomics/peptide_database/2018_12/)), and a reduced version of BFD (produced from as outlined in the Methods from BFD <https://bfd.mmseqs.com/>). Template structures, the SEQRES fasta file, and the 40% sequence clustering were taken from a copy of the PDB downloaded 15/2/2021 (<https://www.rcsb.org/ftp/pdb/ftp-sites>; see also [https://ftp.rcsb.org/pub/pdb/derived\\_data/](https://ftp.rcsb.org/pub/pdb/derived_data/) and <https://cdn.rcsb.org/resources/sequence/clusters/bc-40.out> for sequence data). Experimental structures are drawn from the same copy of the PDB; we show structures with accessions 6YJ1, 6OFS, 1IDQ, 1PRT, 3F1Z, 7KPX and 6VPO. Template search used PDB70, downloaded 10/02/2021 ([http://wwwuser.gwdg.de/~compbiol/data/hhsuite/databases/hhsuite\\_dbs/](http://wwwuser.gwdg.de/~compbiol/data/hhsuite/databases/hhsuite_dbs/)). The CAID dataset was downloaded from (<https://idpcentral.org/caid/data/1/reference/disprot-disorder-pdb-atleast.txt>). CAMEO data was accessed 17/03/2021 from ([https://www.cameo3d.org/static/downloads/modeling/1-year/raw\\_targets-1-year.public.tar.gz](https://www.cameo3d.org/static/downloads/modeling/1-year/raw_targets-1-year.public.tar.gz)). A copy of the current Gene Ontology was downloaded 29/04/2021 from (<http://current.geneontology.org/ontology/go.obo>).

## Field-specific reporting

Please select the one below that is the best fit for your research. If you are not sure, read the appropriate sections before making your selection.

- Life sciences       Behavioural & social sciences       Ecological, evolutionary & environmental sciences

For a reference copy of the document with all sections, see [nature.com/documents/nr-reporting-summary-flat.pdf](https://www.nature.com/documents/nr-reporting-summary-flat.pdf)

## Life sciences study design

All studies must disclose on these points even when the disclosure is negative.

|                 |                                                                                                                                                                                                          |
|-----------------|----------------------------------------------------------------------------------------------------------------------------------------------------------------------------------------------------------|
| Sample size     | This study does not concern a sample; the main results concern the largest subset of the human reference proteome that it was easily practical to inference.                                             |
| Data exclusions | Proteins were excluded from the analysis for length reasons (less than 16 or greater than 2700 residues), or because they contained a nonstandard single letter amino acid code in their fasta sequence. |
| Replication     | Not applicable, no experimental work is described in this study. The results are the output of a computational method which will be made available.                                                      |
| Randomization   | Not applicable, we are not drawing a comparison between two groups                                                                                                                                       |
| Blinding        | Not applicable, we are not drawing a comparison between two groups                                                                                                                                       |

## Reporting for specific materials, systems and methods

We require information from authors about some types of materials, experimental systems and methods used in many studies. Here, indicate whether each material, system or method listed is relevant to your study. If you are not sure if a list item applies to your research, read the appropriate section before selecting a response.

### Materials & experimental systems

| n/a                                 | Involved in the study                                  |
|-------------------------------------|--------------------------------------------------------|
| <input checked="" type="checkbox"/> | <input type="checkbox"/> Antibodies                    |
| <input checked="" type="checkbox"/> | <input type="checkbox"/> Eukaryotic cell lines         |
| <input checked="" type="checkbox"/> | <input type="checkbox"/> Palaeontology and archaeology |
| <input checked="" type="checkbox"/> | <input type="checkbox"/> Animals and other organisms   |
| <input checked="" type="checkbox"/> | <input type="checkbox"/> Human research participants   |
| <input checked="" type="checkbox"/> | <input type="checkbox"/> Clinical data                 |
| <input checked="" type="checkbox"/> | <input type="checkbox"/> Dual use research of concern  |

### Methods

| n/a                                 | Involved in the study                           |
|-------------------------------------|-------------------------------------------------|
| <input checked="" type="checkbox"/> | <input type="checkbox"/> ChIP-seq               |
| <input checked="" type="checkbox"/> | <input type="checkbox"/> Flow cytometry         |
| <input checked="" type="checkbox"/> | <input type="checkbox"/> MRI-based neuroimaging |
